# Supplementary material for: Study of the radical polymerization mechanism and its application in the preparation of high-performance PMMA by reactive extrusion
Source: Royal Society of Chemistry journal article supplement (doi:10.1039/d2ra06441c), 2023-01-01
Supplement: d2ra06441c1.pdf [file d2ra06441c1.pdf]

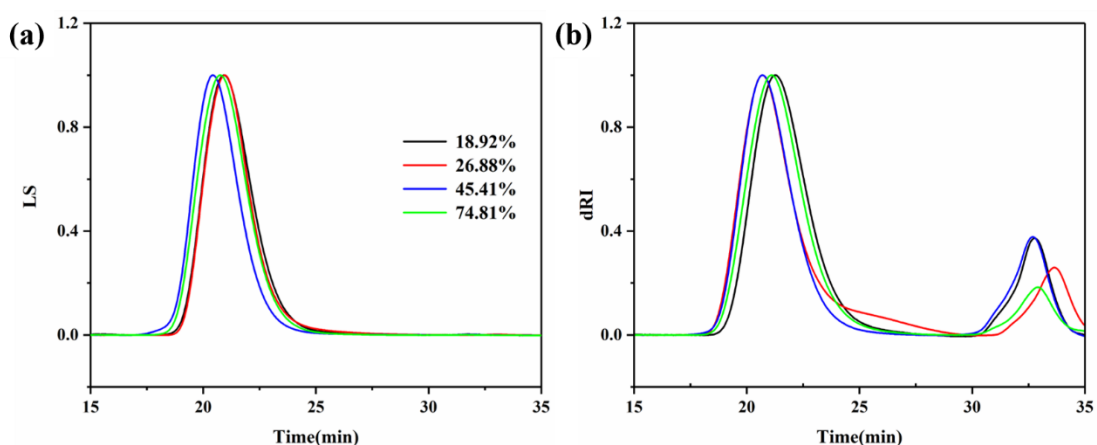

**Fig. S1 MGPC Curves of bulk polymers of pure MMA at different conversion, (a) LS, (b) dRI**

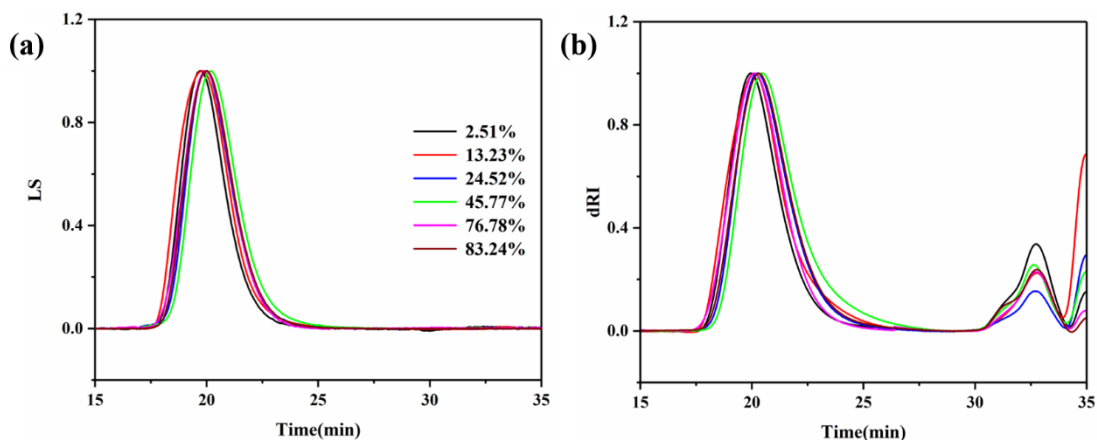

**Fig. S2 MGPC Curves of bulk polymers of MMA with 6% pre-dissolved HWM-PMMA at different conversion, (a) LS, (b) dRI**
